# Supplementary material for: Topologyvs.thermodynamics in chemical reactions: the instability of PH5
Source: Royal Society of Chemistry journal article supplement (doi:10.1039/c7cp06130g), 2017-01-01
Supplement: c7cp06130g1.pdf [file c7cp06130g1.pdf]

## Electronic Supporting Information

for

# **The Bader Energy Density: A new topological tool into the framework of Bader's Theory used to explain the instability of PH<sub>5</sub>**

Christian Tantardini<sup>a†</sup> and Enrico Benassi<sup>a,b</sup>

<sup>a</sup>Novosibirsk State University, Pirogova 2, Novosibirsk 630090, Russian Federation

<sup>b</sup> School of Science and Technology, Nazarbayev University, 53 Kabanbay Batyr Ave., Astana 010000, Republic of Kazakhstan.

<sup>†</sup> Corresponding author Email: [christiantantardini@ymail.com](mailto:christiantantardini@ymail.com)

E.S.I.1 Table of Electronic Energy in a.u. for fluorine systems computed at different levels of theory. Basis set: Aug-cc-pVTZ.

|                                   | HF           | MP2          | QCISD        | CCSD         |
|-----------------------------------|--------------|--------------|--------------|--------------|
| <b>PF<sub>5</sub></b>             | -838.3174734 | -839.7646813 | -839.7639915 | -839.7597792 |
| <b>PF<sub>5</sub> (elongated)</b> | -838.2603209 | -839.7656592 | -839.7650232 | -839.7608302 |
| <b>PF<sub>3</sub></b>             | -639.3055895 | -640.2226753 | -640.2293579 | -640.2262218 |
| <b>F<sub>2</sub></b>              | -198.7609356 | -199.2909071 | -199.2950716 | -199.2938511 |

E.S.I.2 Table of Electronic Energy in a.u. for hydrogen systems computed at different levels of theory. Basis set: Aug-cc-pVTZ.

|                                   | HF           | MP2          | QCISD        | CCSD         |
|-----------------------------------|--------------|--------------|--------------|--------------|
| <b>PH<sub>5</sub></b>             | -343.5500600 | -343.7592943 | -343.7941119 | -343.7938719 |
| <b>PH<sub>5</sub> (elongated)</b> | -343.5514162 | -343.7603523 | -343.7951027 | -343.7948647 |
| <b>PH<sub>3</sub></b>             | -342.4881819 | -342.6612882 | -342.6893993 | -342.6891697 |
| <b>H<sub>2</sub></b>              | -1.1330558   | -1.1650230   | -1.1726355   | -1.1726355   |

**E.S.I.3 Table of PF<sub>5</sub> (elongated) source function (SF) atomic percentage contribution calculated into BCPs at different levels of theory. Basis set: Aug-cc-pVTZ.**

| HF                 |                               |                      |                      |                      |                      |                      |                      |         |
|--------------------|-------------------------------|----------------------|----------------------|----------------------|----------------------|----------------------|----------------------|---------|
| BCP                | $\rho$ (e/bohr <sup>3</sup> ) | SF%(P <sub>1</sub> ) | SF%(F <sub>1</sub> ) | SF%(F <sub>2</sub> ) | SF%(F <sub>3</sub> ) | SF%(F <sub>4</sub> ) | SF%(F <sub>5</sub> ) | TOT SF% |
| P-F <sub>eq1</sub> | 0.22984                       | 28.42                | 53.57                | 3.71                 | 3.71                 | 5.75                 | 5.75                 | 100.90  |
| P-F <sub>ax1</sub> | 0.11291                       | 9.33                 | 14.20                | 44.33                | 4.18                 | 14.20                | 14.20                | 100.44  |
| P-F <sub>ax2</sub> | 0.11291                       | 9.25                 | 14.19                | 4.18                 | 44.34                | 14.20                | 14.20                | 100.35  |
| P-F <sub>eq2</sub> | 0.22984                       | 28.59                | 5.75                 | 3.71                 | 3.71                 | 53.57                | 5.75                 | 101.06  |
| P-F <sub>eq3</sub> | 0.22984                       | 28.59                | 5.74                 | 3.71                 | 3.71                 | 5.75                 | 53.57                | 101.06  |
| MP2                |                               |                      |                      |                      |                      |                      |                      |         |
| BCP                | $\rho$ (e/bohr <sup>3</sup> ) | SF%(P <sub>1</sub> ) | SF%(F <sub>1</sub> ) | SF%(F <sub>2</sub> ) | SF%(F <sub>3</sub> ) | SF%(F <sub>4</sub> ) | SF%(F <sub>5</sub> ) | TOT SF% |
| P-F <sub>eq1</sub> | 0.18422                       | 22.83                | 50.62                | 7.26                 | 7.26                 | 5.83                 | 5.83                 | 99.62   |
| P-F <sub>ax1</sub> | 0.17244                       | 21.36                | 8.59                 | 48.39                | 4.65                 | 8.59                 | 8.59                 | 100.17  |
| P-F <sub>ax2</sub> | 0.17244                       | 21.36                | 8.59                 | 4.65                 | 48.39                | 8.59                 | 8.59                 | 100.17  |
| P-F <sub>eq2</sub> | 0.18422                       | 22.94                | 5.82                 | 7.26                 | 7.26                 | 50.81                | 5.83                 | 99.92   |
| P-F <sub>eq3</sub> | 0.18422                       | 22.94                | 5.82                 | 7.26                 | 7.26                 | 5.83                 | 50.81                | 99.92   |
| QCISD              |                               |                      |                      |                      |                      |                      |                      |         |
| BCP                | $\rho$ (e/bohr <sup>3</sup> ) | SF%(P <sub>1</sub> ) | SF%(F <sub>1</sub> ) | SF%(F <sub>2</sub> ) | SF%(F <sub>3</sub> ) | SF%(F <sub>4</sub> ) | SF%(F <sub>5</sub> ) | TOT SF% |
| P-F <sub>eq1</sub> | 0.18763                       | 23.72                | 51.02                | 7.18                 | 7.18                 | 5.78                 | 5.78                 | 100.65  |
| P-F <sub>ax1</sub> | 0.17516                       | 21.53                | 8.55                 | 48.35                | 4.61                 | 8.55                 | 8.55                 | 100.14  |
| P-F <sub>ax2</sub> | 0.17516                       | 21.53                | 8.55                 | 4.61                 | 48.34                | 8.55                 | 8.55                 | 100.14  |
| P-F <sub>eq2</sub> | 0.18763                       | 23.80                | 5.78                 | 7.18                 | 7.18                 | 51.03                | 5.78                 | 100.74  |
| P-F <sub>eq3</sub> | 0.18763                       | 23.80                | 5.78                 | 7.18                 | 7.18                 | 5.78                 | 51.02                | 100.74  |
| CCSD               |                               |                      |                      |                      |                      |                      |                      |         |
| BCP                | $\rho$ (e/bohr <sup>3</sup> ) | SF%(P <sub>1</sub> ) | SF%(F <sub>1</sub> ) | SF%(F <sub>2</sub> ) | SF%(F <sub>3</sub> ) | SF%(F <sub>4</sub> ) | SF%(F <sub>5</sub> ) | TOT SF% |
| P-F <sub>eq1</sub> | 0.18826                       | 23.75                | 51.05                | 7.17                 | 7.17                 | 5.77                 | 5.77                 | 100.68  |
| P-F <sub>ax1</sub> | 0.17565                       | 21.51                | 8.55                 | 48.38                | 4.60                 | 8.55                 | 8.55                 | 100.13  |
| P-F <sub>ax2</sub> | 0.17565                       | 21.51                | 8.54                 | 4.60                 | 48.38                | 8.55                 | 8.55                 | 100.13  |
| P-F <sub>eq2</sub> | 0.18826                       | 23.83                | 5.77                 | 7.17                 | 7.17                 | 51.06                | 5.77                 | 100.77  |
| P-F <sub>eq3</sub> | 0.18826                       | 23.83                | 5.77                 | 7.17                 | 7.17                 | 5.77                 | 51.06                | 100.76  |

**E.S.I.4 Table of PH<sub>5</sub> elongated source function (SF) atomic percentage contribution calculated into BCPs at different levels of theory.  
Basis set: Aug-cc-pVTZ.**

| HF                 |                               |                      |                      |                      |                      |                      |                      |         |
|--------------------|-------------------------------|----------------------|----------------------|----------------------|----------------------|----------------------|----------------------|---------|
| BCP                | $\rho$ (e/bohr <sup>3</sup> ) | SF%(P <sub>1</sub> ) | SF%(H <sub>1</sub> ) | SF%(H <sub>2</sub> ) | SF%(H <sub>3</sub> ) | SF%(H <sub>4</sub> ) | SF%(H <sub>5</sub> ) | TOT SF% |
| P-H <sub>eq1</sub> | 0.17284                       | 29.20                | 48.39                | 6.14                 | 6.14                 | 5.20                 | 5.20                 | 100.26  |
| P-H <sub>ax1</sub> | 0.15567                       | 27.03                | 7.75                 | 45.90                | 4.05                 | 7.75                 | 7.75                 | 100.24  |
| P-H <sub>ax2</sub> | 0.15567                       | 27.03                | 7.75                 | 4.05                 | 45.90                | 7.75                 | 7.75                 | 100.24  |
| P-H <sub>eq2</sub> | 0.17284                       | 29.19                | 5.20                 | 6.14                 | 6.14                 | 48.40                | 5.20                 | 100.26  |
| P-H <sub>eq3</sub> | 0.17284                       | 29.19                | 5.20                 | 6.14                 | 6.14                 | 5.20                 | 48.40                | 100.26  |
| MP2                |                               |                      |                      |                      |                      |                      |                      |         |
| BCP                | $\rho$ (e/bohr <sup>3</sup> ) | SF%(P <sub>1</sub> ) | SF%(H <sub>1</sub> ) | SF%(H <sub>2</sub> ) | SF%(H <sub>3</sub> ) | SF%(H <sub>4</sub> ) | SF%(H <sub>5</sub> ) | TOT SF% |
| P-H <sub>eq1</sub> | 0.1694                        | 30.46                | 47.24                | 6.09                 | 6.09                 | 5.05                 | 5.05                 | 99.98   |
| P-H <sub>ax1</sub> | 0.15677                       | 28.98                | 7.30                 | 45.14                | 3.93                 | 7.30                 | 7.30                 | 99.95   |
| P-H <sub>ax2</sub> | 0.15677                       | 28.98                | 7.30                 | 3.93                 | 45.15                | 7.30                 | 7.30                 | 99.95   |
| P-H <sub>eq2</sub> | 0.1694                        | 30.45                | 5.05                 | 6.09                 | 6.09                 | 47.25                | 5.05                 | 99.98   |
| P-H <sub>eq3</sub> | 0.1694                        | 30.45                | 5.05                 | 6.09                 | 6.09                 | 5.05                 | 47.25                | 99.98   |
| QCISD              |                               |                      |                      |                      |                      |                      |                      |         |
| BCP                | $\rho$ (e/bohr <sup>3</sup> ) | SF%(P <sub>1</sub> ) | SF%(H <sub>1</sub> ) | SF%(H <sub>2</sub> ) | SF%(H <sub>3</sub> ) | SF%(H <sub>4</sub> ) | SF%(H <sub>5</sub> ) | TOT SF% |
| P-H <sub>eq1</sub> | 0.16805                       | 31.93                | 47.06                | 6.06                 | 6.06                 | 5.01                 | 5.01                 | 101.15  |
| P-H <sub>ax1</sub> | 0.1561                        | 30.54                | 7.22                 | 45.02                | 3.89                 | 7.22                 | 7.22                 | 101.11  |
| P-H <sub>ax2</sub> | 0.1561                        | 30.53                | 7.22                 | 3.89                 | 45.02                | 7.22                 | 7.22                 | 101.11  |
| P-H <sub>eq2</sub> | 0.16805                       | 31.90                | 5.01                 | 6.06                 | 6.06                 | 47.07                | 5.01                 | 101.12  |
| P-H <sub>eq3</sub> | 0.16805                       | 31.90                | 5.01                 | 6.06                 | 6.06                 | 5.01                 | 47.07                | 101.12  |
| CCSD               |                               |                      |                      |                      |                      |                      |                      |         |
| BCP                | $\rho$ (e/bohr <sup>3</sup> ) | SF%(P <sub>1</sub> ) | SF%(H <sub>1</sub> ) | SF%(H <sub>2</sub> ) | SF%(H <sub>3</sub> ) | SF%(H <sub>4</sub> ) | SF%(H <sub>5</sub> ) | TOT SF% |
| P-H <sub>eq1</sub> | 0.16812                       | 30.65                | 47.08                | 6.07                 | 6.07                 | 5.02                 | 5.02                 | 99.90   |
| P-H <sub>ax1</sub> | 0.15615                       | 29.27                | 7.22                 | 45.03                | 3.90                 | 7.22                 | 7.22                 | 99.87   |
| P-H <sub>ax2</sub> | 0.15615                       | 29.27                | 7.22                 | 3.90                 | 45.03                | 7.22                 | 7.22                 | 99.87   |
| P-H <sub>eq2</sub> | 0.16812                       | 30.64                | 5.02                 | 6.07                 | 6.07                 | 47.08                | 5.02                 | 99.89   |
| P-H <sub>eq3</sub> | 0.16812                       | 30.64                | 5.02                 | 6.07                 | 6.07                 | 5.02                 | 47.08                | 99.89   |

**E.S.I.5 Table of PF<sub>5</sub> source function (SF) atomic percentage contribution calculated into BCPs at different levels of theory. Basis set: Aug-cc-pVTZ.**

| HF                 |                               |                      |                      |                      |                      |                      |                      |         |
|--------------------|-------------------------------|----------------------|----------------------|----------------------|----------------------|----------------------|----------------------|---------|
| BCP                | $\rho$ (e/bohr <sup>3</sup> ) | SF%(P <sub>1</sub> ) | SF%(F <sub>1</sub> ) | SF%(F <sub>2</sub> ) | SF%(F <sub>3</sub> ) | SF%(F <sub>4</sub> ) | SF%(F <sub>5</sub> ) | TOT SF% |
| P-F <sub>eq1</sub> | 0.19019                       | 22.65                | 51.17                | 7.52                 | 7.52                 | 5.54                 | 5.54                 | 99.94   |
| P-F <sub>ax1</sub> | 0.19171                       | 22.21                | 7.76                 | 49.37                | 4.51                 | 7.76                 | 7.76                 | 99.38   |
| P-F <sub>ax2</sub> | 0.19171                       | 22.21                | 7.76                 | 4.51                 | 49.38                | 7.76                 | 7.76                 | 99.37   |
| P-F <sub>eq2</sub> | 0.19019                       | 22.75                | 5.54                 | 7.52                 | 7.52                 | 51.18                | 5.54                 | 100.05  |
| P-F <sub>eq3</sub> | 0.19019                       | 22.74                | 5.54                 | 7.52                 | 7.52                 | 5.54                 | 51.18                | 100.04  |
| MP2                |                               |                      |                      |                      |                      |                      |                      |         |
| BCP                | $\rho$ (e/bohr <sup>3</sup> ) | SF%(P <sub>1</sub> ) | SF%(F <sub>1</sub> ) | SF%(F <sub>2</sub> ) | SF%(F <sub>3</sub> ) | SF%(F <sub>4</sub> ) | SF%(F <sub>5</sub> ) | TOT SF% |
| P-F <sub>eq1</sub> | 0.17850                       | 22.00                | 50.44                | 7.81                 | 7.81                 | 5.80                 | 5.80                 | 99.66   |
| P-F <sub>ax1</sub> | 0.18052                       | 21.71                | 8.01                 | 48.73                | 4.68                 | 8.01                 | 8.01                 | 99.16   |
| P-F <sub>ax2</sub> | 0.18052                       | 21.72                | 8.01                 | 4.68                 | 48.73                | 8.01                 | 8.01                 | 99.16   |
| P-F <sub>eq2</sub> | 0.17850                       | 22.07                | 5.79                 | 7.81                 | 7.81                 | 50.46                | 5.80                 | 99.74   |
| P-F <sub>eq3</sub> | 0.17850                       | 22.07                | 5.79                 | 7.81                 | 7.81                 | 5.80                 | 50.46                | 99.74   |
| QCISD              |                               |                      |                      |                      |                      |                      |                      |         |
| BCP                | $\rho$ (e/bohr <sup>3</sup> ) | SF%(P <sub>1</sub> ) | SF%(F <sub>1</sub> ) | SF%(F <sub>2</sub> ) | SF%(F <sub>3</sub> ) | SF%(F <sub>4</sub> ) | SF%(F <sub>5</sub> ) | TOT SF% |
| P-F <sub>eq1</sub> | 0.18171                       | 22.11                | 50.67                | 7.74                 | 7.74                 | 5.75                 | 5.75                 | 99.76   |
| P-F <sub>ax1</sub> | 0.18355                       | 21.75                | 7.96                 | 48.90                | 4.64                 | 7.96                 | 7.96                 | 99.18   |
| P-F <sub>ax2</sub> | 0.18355                       | 21.76                | 7.96                 | 4.65                 | 48.89                | 7.96                 | 7.96                 | 99.18   |
| P-F <sub>eq2</sub> | 0.18171                       | 22.18                | 5.75                 | 7.74                 | 7.74                 | 50.67                | 5.75                 | 99.83   |
| P-F <sub>eq3</sub> | 0.18171                       | 22.19                | 5.75                 | 7.74                 | 7.74                 | 5.75                 | 50.67                | 99.84   |
| CCSD               |                               |                      |                      |                      |                      |                      |                      |         |
| BCP                | $\rho$ (e/bohr <sup>3</sup> ) | SF%(P <sub>1</sub> ) | SF%(F <sub>1</sub> ) | SF%(F <sub>2</sub> ) | SF%(F <sub>3</sub> ) | SF%(F <sub>4</sub> ) | SF%(F <sub>5</sub> ) | TOT SF% |
| P-F <sub>eq1</sub> | 0.18230                       | 22.13                | 50.66                | 7.73                 | 7.73                 | 5.74                 | 5.74                 | 99.73   |
| P-F <sub>ax1</sub> | 0.18413                       | 21.81                | 7.95                 | 48.90                | 4.64                 | 7.95                 | 7.96                 | 99.21   |
| P-F <sub>ax2</sub> | 0.18413                       | 21.80                | 7.95                 | 4.64                 | 48.90                | 7.95                 | 7.96                 | 99.20   |
| P-F <sub>eq2</sub> | 0.18230                       | 22.21                | 5.73                 | 7.73                 | 7.73                 | 50.67                | 5.74                 | 99.81   |
| P-F <sub>eq3</sub> | 0.18230                       | 22.20                | 5.73                 | 7.73                 | 7.73                 | 5.74                 | 50.67                | 99.80   |

**E.S.I.6 Table of PH<sub>5</sub> source function (SF) atomic percentage contribution calculated into BCPs at different levels of theory. Basis set: Aug-cc-pVTZ.**

| HF                 |                               |                      |                      |                      |                      |                      |                      |         |
|--------------------|-------------------------------|----------------------|----------------------|----------------------|----------------------|----------------------|----------------------|---------|
| BCP                | $\rho$ (e/bohr <sup>3</sup> ) | SF%(P <sub>1</sub> ) | SF%(H <sub>1</sub> ) | SF%(H <sub>2</sub> ) | SF%(H <sub>3</sub> ) | SF%(H <sub>4</sub> ) | SF%(H <sub>5</sub> ) | TOT SF% |
| P-H <sub>eq1</sub> | 0.16645                       | 28.12                | 47.84                | 6.79                 | 6.79                 | 5.12                 | 5.12                 | 99.78   |
| P-H <sub>ax1</sub> | 0.16571                       | 27.66                | 7.07                 | 46.76                | 4.15                 | 7.07                 | 7.07                 | 99.79   |
| P-H <sub>ax2</sub> | 0.16571                       | 27.66                | 7.07                 | 4.15                 | 46.76                | 7.07                 | 7.07                 | 99.79   |
| P-H <sub>eq2</sub> | 0.16645                       | 28.11                | 5.12                 | 6.79                 | 6.79                 | 47.88                | 5.12                 | 99.81   |
| P-H <sub>eq3</sub> | 0.16645                       | 28.11                | 5.12                 | 6.79                 | 6.79                 | 5.12                 | 47.87                | 99.81   |
| MP2                |                               |                      |                      |                      |                      |                      |                      |         |
| BCP                | $\rho$ (e/bohr <sup>3</sup> ) | SF%(P <sub>1</sub> ) | SF%(H <sub>1</sub> ) | SF%(H <sub>2</sub> ) | SF%(H <sub>3</sub> ) | SF%(H <sub>4</sub> ) | SF%(H <sub>5</sub> ) | TOT SF% |
| P-H <sub>eq1</sub> | 0.16399                       | 30.03                | 46.70                | 6.67                 | 6.67                 | 4.95                 | 4.95                 | 99.97   |
| P-H <sub>ax1</sub> | 0.16512                       | 29.74                | 6.74                 | 45.97                | 4.04                 | 6.74                 | 6.74                 | 99.97   |
| P-H <sub>ax2</sub> | 0.16512                       | 29.74                | 6.74                 | 4.04                 | 45.97                | 6.74                 | 6.74                 | 99.97   |
| P-H <sub>eq2</sub> | 0.16399                       | 30.03                | 4.95                 | 6.67                 | 6.67                 | 46.70                | 4.95                 | 99.97   |
| P-H <sub>eq3</sub> | 0.16399                       | 30.03                | 4.95                 | 6.67                 | 6.67                 | 4.95                 | 46.70                | 99.97   |
| QCISD              |                               |                      |                      |                      |                      |                      |                      |         |
| BCP                | $\rho$ (e/bohr <sup>3</sup> ) | SF%(P <sub>1</sub> ) | SF%(H <sub>1</sub> ) | SF%(H <sub>2</sub> ) | SF%(H <sub>3</sub> ) | SF%(H <sub>4</sub> ) | SF%(H <sub>5</sub> ) | TOT SF% |
| P-H <sub>eq1</sub> | 0.16275                       | 31.64                | 46.47                | 6.63                 | 6.63                 | 4.91                 | 4.91                 | 101.20  |
| P-H <sub>ax1</sub> | 0.16416                       | 31.31                | 6.67                 | 45.84                | 4.02                 | 6.67                 | 6.67                 | 101.18  |
| P-H <sub>ax2</sub> | 0.16416                       | 31.31                | 6.67                 | 4.02                 | 45.84                | 6.67                 | 6.67                 | 101.18  |
| P-H <sub>eq2</sub> | 0.16275                       | 31.62                | 4.91                 | 6.63                 | 6.63                 | 46.51                | 4.91                 | 101.21  |
| P-H <sub>eq3</sub> | 0.16275                       | 31.62                | 4.91                 | 6.63                 | 6.63                 | 4.91                 | 46.51                | 101.21  |
| CCSD               |                               |                      |                      |                      |                      |                      |                      |         |
| BCP                | $\rho$ (e/bohr <sup>3</sup> ) | SF%(P <sub>1</sub> ) | SF%(H <sub>1</sub> ) | SF%(H <sub>2</sub> ) | SF%(H <sub>3</sub> ) | SF%(H <sub>4</sub> ) | SF%(H <sub>5</sub> ) | TOT SF% |
| P-H <sub>eq1</sub> | 0.16282                       | 31.62                | 46.49                | 6.64                 | 6.63                 | 4.91                 | 4.91                 | 101.21  |
| P-H <sub>ax1</sub> | 0.1642                        | 31.29                | 6.68                 | 45.85                | 4.02                 | 6.68                 | 6.68                 | 101.20  |
| P-H <sub>ax2</sub> | 0.1642                        | 31.29                | 6.68                 | 4.02                 | 45.85                | 6.68                 | 6.68                 | 101.20  |
| P-H <sub>eq2</sub> | 0.16282                       | 31.60                | 4.91                 | 6.64                 | 6.63                 | 46.53                | 4.91                 | 101.23  |
| P-H <sub>eq3</sub> | 0.16282                       | 31.60                | 4.91                 | 6.64                 | 6.63                 | 4.91                 | 46.53                | 101.23  |

**E.S.I.8 Table of PF<sub>3</sub> source function (SF) atomic percentage contribution calculated into BCPs at different levels of theory. Basis set: Aug-cc-pVTZ.**

| <b>HF</b>        |                               |                      |                      |                      |                      |         |
|------------------|-------------------------------|----------------------|----------------------|----------------------|----------------------|---------|
| BCP              | $\rho$ (e/bohr <sup>3</sup> ) | SF%(P <sub>1</sub> ) | SF%(F <sub>1</sub> ) | SF%(F <sub>2</sub> ) | SF%(F <sub>3</sub> ) | TOT SF% |
| P-F <sub>1</sub> | 0.17893                       | 34.53                | 51.10                | 7.09                 | 7.10                 | 99.82   |
| P-F <sub>2</sub> | 0.17893                       | 34.85                | 7.10                 | 51.32                | 7.10                 | 100.36  |
| P-F <sub>3</sub> | 0.17893                       | 34.53                | 7.10                 | 7.09                 | 51.11                | 99.82   |
| <b>MP2</b>       |                               |                      |                      |                      |                      |         |
| BCP              | $\rho$ (e/bohr <sup>3</sup> ) | SF%(P <sub>1</sub> ) | SF%(F <sub>1</sub> ) | SF%(F <sub>2</sub> ) | SF%(F <sub>3</sub> ) | TOT SF% |
| P-F <sub>1</sub> | 0.16732                       | 35.89                | 50.20                | 7.32                 | 7.32                 | 100.73  |
| P-F <sub>2</sub> | 0.16732                       | 36.04                | 7.32                 | 50.42                | 7.32                 | 101.09  |
| P-F <sub>3</sub> | 0.16732                       | 35.87                | 7.32                 | 7.32                 | 50.22                | 100.73  |
| <b>QCISD</b>     |                               |                      |                      |                      |                      |         |
| BCP              | $\rho$ (e/bohr <sup>3</sup> ) | SF%(P <sub>1</sub> ) | SF%(F <sub>1</sub> ) | SF%(F <sub>2</sub> ) | SF%(F <sub>3</sub> ) | TOT SF% |
| P-F <sub>1</sub> | 0.17002                       | 34.58                | 50.49                | 7.28                 | 7.28                 | 99.63   |
| P-F <sub>2</sub> | 0.17002                       | 34.83                | 7.28                 | 50.49                | 7.28                 | 99.88   |
| P-F <sub>3</sub> | 0.17002                       | 34.80                | 7.28                 | 7.28                 | 50.50                | 99.86   |
| <b>CCSD</b>      |                               |                      |                      |                      |                      |         |
| BCP              | $\rho$ (e/bohr <sup>3</sup> ) | SF%(P <sub>1</sub> ) | SF%(F <sub>1</sub> ) | SF%(F <sub>2</sub> ) | SF%(F <sub>3</sub> ) | TOT SF% |
| P-F <sub>1</sub> | 0.17077                       | 34.86                | 50.41                | 7.27                 | 7.28                 | 99.82   |
| P-F <sub>2</sub> | 0.17077                       | 35.07                | 7.28                 | 50.61                | 7.28                 | 100.23  |
| P-F <sub>3</sub> | 0.17077                       | 34.86                | 7.28                 | 7.27                 | 50.40                | 99.81   |



**E.S.I.9 Table of PH<sub>3</sub> source function (SF) atomic percentage contribution calculated into BCPs at different levels of theory. Basis set: Aug-cc-pVTZ.**

| <b>HF</b>        |                               |                      |                      |                      |                      |         |
|------------------|-------------------------------|----------------------|----------------------|----------------------|----------------------|---------|
| BCP              | $\rho$ (e/bohr <sup>3</sup> ) | SF%(P <sub>1</sub> ) | SF%(H <sub>1</sub> ) | SF%(H <sub>2</sub> ) | SF%(H <sub>3</sub> ) | TOT SF% |
| P-H <sub>1</sub> | 0.16627                       | 40.37                | 47.14                | 6.57                 | 6.57                 | 100.66  |
| P-H <sub>2</sub> | 0.16627                       | 40.39                | 6.57                 | 47.14                | 6.57                 | 100.67  |
| P-H <sub>3</sub> | 0.16627                       | 40.37                | 6.57                 | 6.57                 | 47.14                | 100.66  |
| <b>MP2</b>       |                               |                      |                      |                      |                      |         |
| BCP              | $\rho$ (e/bohr <sup>3</sup> ) | SF%(P <sub>1</sub> ) | SF%(H <sub>1</sub> ) | SF%(H <sub>2</sub> ) | SF%(H <sub>3</sub> ) | TOT SF% |
| P-H <sub>1</sub> | 0.16325                       | 42.13                | 45.61                | 6.43                 | 6.43                 | 100.59  |
| P-H <sub>2</sub> | 0.16325                       | 42.15                | 6.43                 | 45.59                | 6.43                 | 100.59  |
| P-H <sub>3</sub> | 0.16325                       | 42.13                | 6.43                 | 6.43                 | 45.61                | 100.60  |
| <b>QCISD</b>     |                               |                      |                      |                      |                      |         |
| BCP              | $\rho$ (e/bohr <sup>3</sup> ) | SF%(P <sub>1</sub> ) | SF%(H <sub>1</sub> ) | SF%(H <sub>2</sub> ) | SF%(H <sub>3</sub> ) | TOT SF% |
| P-H <sub>1</sub> | 0.1621                        | 42.41                | 45.55                | 6.38                 | 6.38                 | 100.72  |
| P-H <sub>2</sub> | 0.1621                        | 42.40                | 6.38                 | 45.54                | 6.38                 | 100.70  |
| P-H <sub>3</sub> | 0.1621                        | 42.42                | 6.38                 | 6.38                 | 45.54                | 100.72  |
| <b>CCSD</b>      |                               |                      |                      |                      |                      |         |
| BCP              | $\rho$ (e/bohr <sup>3</sup> ) | SF%(P <sub>1</sub> ) | SF%(H <sub>1</sub> ) | SF%(H <sub>2</sub> ) | SF%(H <sub>3</sub> ) | TOT SF% |
| P-H <sub>1</sub> | 0.16218                       | 43.49                | 45.55                | 6.38                 | 6.38                 | 101.80  |
| P-H <sub>2</sub> | 0.16218                       | 43.56                | 6.38                 | 45.53                | 6.38                 | 101.86  |
| P-H <sub>3</sub> | 0.16218                       | 43.49                | 6.38                 | 6.38                 | 45.55                | 101.80  |



**E.S.I.11 Table of F<sub>2</sub>source function (SF) atomic percentage contribution calculated into BCPs for each theoretical approach. Basis set: Aug-cc-pVTZ.**

| <b>HF</b>    |                               |                      |                      |         |
|--------------|-------------------------------|----------------------|----------------------|---------|
| BCP          | $\rho$ (e/bohr <sup>3</sup> ) | SF%(F <sub>1</sub> ) | SF%(F <sub>2</sub> ) | TOT SF% |
| F1-F2        | 0.37755                       | 49.99                | 50.00                | 99.99   |
| <b>MP2</b>   |                               |                      |                      |         |
| BCP          | $\rho$ (e/bohr <sup>3</sup> ) | SF%(F <sub>1</sub> ) | SF%(F <sub>2</sub> ) | TOT SF% |
| F1-F2        | 0.28983                       | 50.00                | 50.00                | 100.00  |
| <b>QCISD</b> |                               |                      |                      |         |
| BCP          | $\rho$ (e/bohr <sup>3</sup> ) | SF%(F <sub>1</sub> ) | SF%(F <sub>2</sub> ) | TOT SF% |
| F1-F2        | 0.29652                       | 49.99                | 49.99                | 99.98   |
| <b>CCSD</b>  |                               |                      |                      |         |
| BCP          | $\rho$ (e/bohr <sup>3</sup> ) | SF%(F <sub>1</sub> ) | SF%(F <sub>2</sub> ) | TOT SF% |
| F1-F2        | 0.29782                       | 50.02                | 50.01                | 100.03  |

**E.S.I.12 Table of H<sub>2</sub> source function (SF) atomic percentage contribution calculated into BCPs for each theoretical approach. Basis set: Aug-cc-pVTZ.**

| <b>HF</b>    |                               |                      |                      |         |
|--------------|-------------------------------|----------------------|----------------------|---------|
| BOND         | $\rho$ (e/bohr <sup>3</sup> ) | SF%(H <sub>1</sub> ) | SF%(H <sub>2</sub> ) | TOT SF% |
| H1-H2        | 0.27451                       | 49.99                | 49.99                | 99.97   |
| <b>MP2</b>   |                               |                      |                      |         |
| BCP          | $\rho$ (e/bohr <sup>3</sup> ) | SF%(H <sub>1</sub> ) | SF%(H <sub>2</sub> ) | TOT SF% |
| H1-H2        | 0.27242                       | 50.00                | 50.00                | 100.01  |
| <b>QCISD</b> |                               |                      |                      |         |
| BCP          | $\rho$ (e/bohr <sup>3</sup> ) | SF%(H <sub>1</sub> ) | SF%(H <sub>2</sub> ) | TOT SF% |
| H1-H2        | 0.26783                       | 50.01                | 50.01                | 100.02  |
| <b>CCSD</b>  |                               |                      |                      |         |
| BCP          | $\rho$ (e/bohr <sup>3</sup> ) | SF%(H <sub>1</sub> ) | SF%(H <sub>2</sub> ) | TOT SF% |
| H1-H2        | 0.26783                       | 50.01                | 50.01                | 100.02  |

**E.S.I.13 Table of elongated PF<sub>5</sub> integrated atomic charge for each theoretical approach. Basis set: Aug-cc-pVTZ.**

| ATOM             | HF    | MP2   | QCISD | CCSD  |
|------------------|-------|-------|-------|-------|
| P                | 4.25  | 4.12  | 4.16  | 4.17  |
| F <sub>eq1</sub> | -0.86 | -0.82 | -0.83 | -0.83 |
| F <sub>ax1</sub> | -0.84 | -0.83 | -0.83 | -0.84 |
| F <sub>ax2</sub> | -0.84 | -0.83 | -0.83 | -0.84 |
| F <sub>eq2</sub> | -0.86 | -0.82 | -0.83 | -0.83 |
| F <sub>eq3</sub> | -0.86 | -0.82 | -0.83 | -0.83 |

**E.S.I.14 Table of elongated PH<sub>5</sub> integrated atomic charge for each theoretical approach. Basis set: Aug-cc-pVTZ.**

| ATOM             | HF    | MP2   | QCISD | CCSD  |
|------------------|-------|-------|-------|-------|
| P                | 3.35  | 3.11  | 3.07  | 3.07  |
| H <sub>eq1</sub> | -0.64 | -0.59 | -0.58 | -0.58 |
| H <sub>ax1</sub> | -0.71 | -0.67 | -0.66 | -0.67 |
| H <sub>ax2</sub> | -0.71 | -0.67 | -0.66 | -0.67 |
| H <sub>eq2</sub> | -0.64 | -0.59 | -0.58 | -0.58 |
| H <sub>eq3</sub> | -0.64 | -0.59 | -0.58 | -0.58 |

E.S.I.15 Table of PF<sub>3</sub> integrated atomic charge for each theoretical approach. Basis set: Aug-cc-pVTZ.

| ATOM           | HF    | MP2   | QCISD | CCSD  |
|----------------|-------|-------|-------|-------|
| P              | 2.64  | 2.52  | 2.54  | 2.55  |
| F <sub>1</sub> | -0.88 | -0.84 | -0.85 | -0.85 |
| F <sub>2</sub> | -0.88 | -0.84 | -0.85 | -0.85 |
| F <sub>3</sub> | -0.88 | -0.84 | -0.85 | -0.85 |

**E.S.I.16 Table of PH<sub>3</sub> integrated atomic charge for each theoretical approach. Basis set: Aug-cc-pVTZ.**

| ATOM           | HF    | MP2   | QCISD | CCSD  |
|----------------|-------|-------|-------|-------|
| P              | 1.90  | 1.70  | 1.69  | 1.69  |
| H <sub>1</sub> | -0.63 | -0.56 | -0.56 | -0.56 |
| H <sub>2</sub> | -0.63 | -0.56 | -0.56 | -0.56 |
| H <sub>3</sub> | -0.63 | -0.56 | -0.56 | -0.56 |



**E.S.I.17 Table of  $F_2$  integrated atomic charge for each theoretical approach. Basis set: Aug-cc-pVTZ.\***

| ATOM           | HF   | MP2  | QCISD | CCSD |
|----------------|------|------|-------|------|
| F <sub>1</sub> | 0.00 | 0.00 | 0.00  | 0.00 |
| F <sub>2</sub> | 0.00 | 0.00 | 0.00  | 0.00 |

\*The results are null for symmetry but were reported for the sake of honesty

**E.S.I.18 Table of H<sub>2</sub> integrated atomic charge for each theoretical approach. Basis set: Aug-cc-pVTZ.\***

| ATOM           | HF   | MP2  | QCISD | CCSD |
|----------------|------|------|-------|------|
| H <sub>1</sub> | 0.00 | 0.00 | 0.00  | 0.00 |
| H <sub>2</sub> | 0.00 | 0.00 | 0.00  | 0.00 |

\*The results are null for symmetry but were reported for the sake of honesty

**E.S.I.19 Table of Atomic basin energies (a.u.) for different theoretical approach used for the reaction  $\text{PF}_5 \rightarrow \text{PF}_3 + \text{F}_2$**

| <b>PF<sub>5</sub></b> | <b>HF</b> | <b>MP2</b> | <b>QCISD</b> | <b>CCSD</b> |
|-----------------------|-----------|------------|--------------|-------------|
| P                     | -338.24   | -338.42    | -338.37      | -338.36     |
| F <sub>eq1</sub>      | -100.18   | -100.27    | -100.28      | -100.28     |
| F <sub>ax1</sub>      | -99.73    | -100.27    | -100.28      | -100.28     |
| F <sub>ax2</sub>      | -99.73    | -100.27    | -100.28      | -100.28     |
| F <sub>eq2</sub>      | -100.18   | -100.27    | -100.28      | -100.28     |
| F <sub>eq3</sub>      | -100.18   | -100.27    | -100.28      | -100.28     |
| <b>PF<sub>3</sub></b> | <b>HF</b> | <b>MP2</b> | <b>QCISD</b> | <b>CCSD</b> |
| P                     | -339.35   | -339.62    | -339.59      | -339.58     |
| F <sub>1</sub>        | -99.98    | -100.20    | -100.21      | -100.21     |
| F <sub>2</sub>        | -99.98    | -100.20    | -100.21      | -100.21     |
| F <sub>3</sub>        | -99.98    | -100.20    | -100.21      | -100.21     |
| <b>F<sub>2</sub></b>  | <b>HF</b> | <b>MP2</b> | <b>QCISD</b> | <b>CCSD</b> |
| F <sub>1</sub>        | -99.38    | -99.65     | -99.65       | -99.65      |
| F <sub>2</sub>        | -99.38    | -99.65     | -99.65       | -99.65      |

**E.S.I.20 Table of Atomic basin energies (a.u) for different theoretical approach used for the reaction  $\text{PH}_5 \rightarrow \text{PH}_3 + \text{H}_2$** 

| $\text{PH}_5$           | HF      | MP2     | QCISD   | CCSD    |
|-------------------------|---------|---------|---------|---------|
| P                       | -339.18 | -339.45 | -339.47 | -339.46 |
| $\text{H}_{\text{eq1}}$ | -0.87   | -0.85   | -0.86   | -0.86   |
| $\text{H}_{\text{ax1}}$ | -0.88   | -0.88   | -0.88   | -0.88   |
| $\text{H}_{\text{ax2}}$ | -0.88   | -0.88   | -0.88   | -0.88   |
| $\text{H}_{\text{eq2}}$ | -0.87   | -0.85   | -0.86   | -0.86   |
| $\text{H}_{\text{eq3}}$ | -0.87   | -0.85   | -0.86   | -0.86   |
| $\text{PH}_3$           | HF      | MP2     | QCISD   | CCSD    |
| P                       | -340.00 | -340.22 | -340.23 | -340.23 |
| $\text{H}_1$            | -0.83   | -0.81   | -0.82   | -0.82   |
| $\text{H}_2$            | -0.83   | -0.81   | -0.82   | -0.82   |
| $\text{H}_3$            | -0.83   | -0.81   | -0.82   | -0.82   |
| $\text{H}_2$            | HF      | MP2     | QCISD   | CCSD    |
| $\text{H}_1$            | -0.57   | -0.58   | -0.59   | -0.59   |
| $\text{H}_2$            | -0.57   | -0.58   | -0.59   | -0.59   |

**E.S.I.21 Table of bond distances (Å) for the elongated and not of PH<sub>5</sub> and PF<sub>5</sub> and for PH<sub>3</sub> PF<sub>3</sub> F<sub>2</sub> H<sub>2</sub> at each different level of theory**

| PH <sub>5</sub> (elongated) | HF      | MP2     | QCISD   | CCSD    |
|-----------------------------|---------|---------|---------|---------|
| P-H <sub>eq</sub>           | 1.40997 | 1.41751 | 1.42252 | 1.41237 |
| P-H <sub>ax</sub>           | 1.47448 | 1.47504 | 1.47931 | 1.47915 |
| PH <sub>5</sub>             | HF      | MP2     | QCISD   | CCSD    |
| P-H                         | 1.43438 | 1.43959 | 1.44446 | 1.44431 |
| PF <sub>5</sub> (elongated) | HF      | MP2     | QCISD   | CCSD    |
| P-F <sub>eq</sub>           | 1.45384 | 1.55100 | 1.54428 | 1.54282 |
| P-F <sub>ax</sub>           | 1.80000 | 1.58958 | 1.58310 | 1.58180 |
| PF <sub>5</sub>             | HF      | MP2     | QCISD   | CCSD    |
| P-F                         | 1.53567 | 1.56656 | 1.55993 | 1.55852 |
| PH <sub>3</sub>             | HF      | MP2     | QCISD   | CCSD    |
| P-H                         | 1.40781 | 1.41247 | 1.41742 | 1.41724 |
| PF <sub>3</sub>             | HF      | MP2     | QCISD   | CCSD    |
| P-F                         | 1.54731 | 1.58209 | 1.57537 | 1.57339 |
| H <sub>2</sub>              | HF      | MP2     | QCISD   | CCSD    |
| H-H                         | 0.73444 | 0.73744 | 0.74298 | 0.74298 |
| F <sub>2</sub>              | HF      | MP2     | QCISD   | CCSD    |
| F-F                         | 1.32819 | 1.40137 | 1.39708 | 1.39567 |

E.S.I.22 Table of Eigenvectors of Dipole moment tensor,  $\mu_j$ , of atomic basin for the elongated  $\text{PH}_5$  and  $\text{PF}_5$  at QCISD/Aug-cc-pVTZ level.

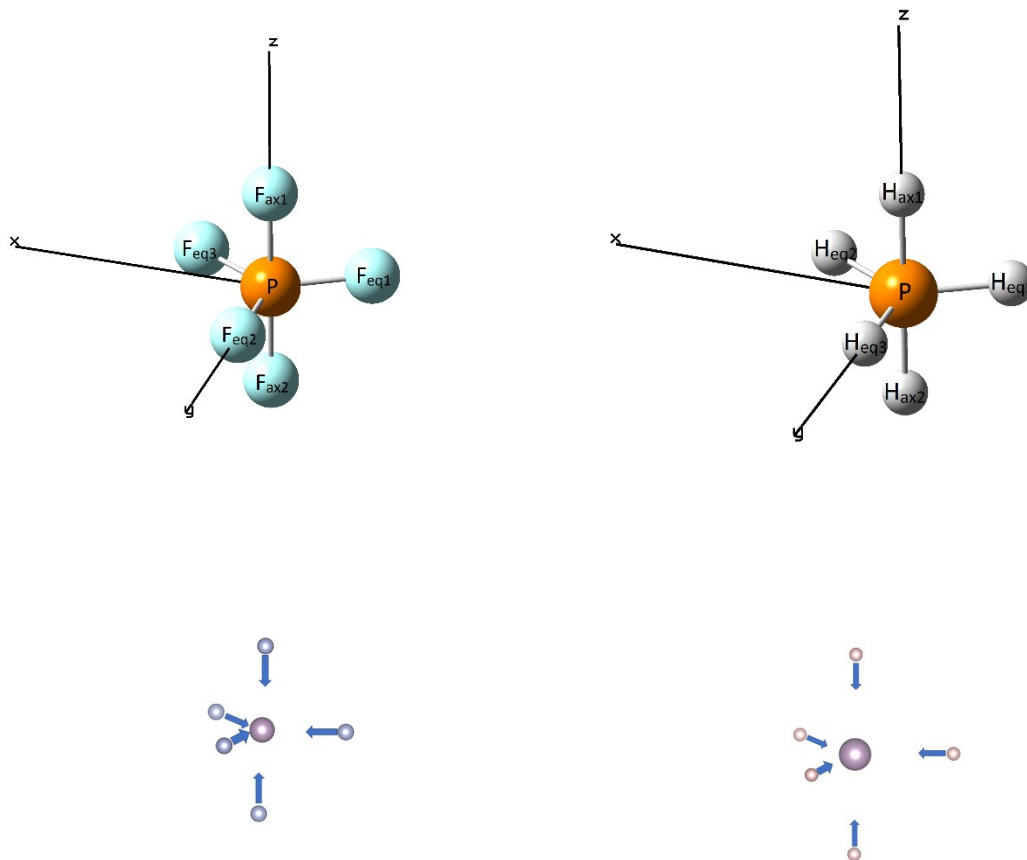

| $F_{\text{eq}1}$    |         |         | $F_{\text{ax}1}$    |         |         | $F_{\text{ax}2}$    |         |         | $F_{\text{eq}2}$    |         |         | $F_{\text{eq}3}$    |         |         |
|---------------------|---------|---------|---------------------|---------|---------|---------------------|---------|---------|---------------------|---------|---------|---------------------|---------|---------|
| $\mu_x$             | $\mu_y$ | $\mu_z$ |
| 0.00                | 0.60    | 0.00    | 0.00                | 0.00    | 0.51    | 0.00                | 0.00    | -0.51   | 0.52                | -0.30   | 0.00    | -0.52               | -0.30   | 0.00    |
| $ \mu /\text{a.u.}$ |         |         | $ \mu /\text{a.u.}$ |         |         | $ \mu /\text{a.u.}$ |         |         | $ \mu /\text{a.u.}$ |         |         | $ \mu /\text{a.u.}$ |         |         |
| 0.60                |         |         | 0.51                |         |         | 0.51                |         |         | 0.60                |         |         | 0.60                |         |         |

| $H_{\text{eq}1}$    |         |         | $H_{\text{ax}1}$    |         |         | $H_{\text{ax}2}$    |         |         | $H_{\text{eq}2}$    |         |         | $H_{\text{eq}3}$    |         |         |
|---------------------|---------|---------|---------------------|---------|---------|---------------------|---------|---------|---------------------|---------|---------|---------------------|---------|---------|
| $\mu_x$             | $\mu_y$ | $\mu_z$ |
| 0.00                | 0.36    | 0.00    | 0.00                | 0.00    | -0.26   | 0.00                | 0.00    | 0.26    | -0.31               | -0.18   | 0.00    | 0.31                | -0.18   | 0.00    |
| $ \mu /\text{a.u.}$ |         |         | $ \mu /\text{a.u.}$ |         |         | $ \mu /\text{a.u.}$ |         |         | $ \mu /\text{a.u.}$ |         |         | $ \mu /\text{a.u.}$ |         |         |
| 0.36                |         |         | 0.26                |         |         | 0.26                |         |         | 0.36                |         |         | 0.36                |         |         |

E.S.I.23 "Bader like" calculated values of 3-centre bond indexes for  $X_{ax}-P-X_{ax}^*$  and 2-centre bond indexes for  $P-X_{ax}^*$  and  $P-X_{eq}^*$  within  $PX_5$ .

| Bond Indexes        | Basis Set |          |         |
|---------------------|-----------|----------|---------|
|                     | 6-31G**   | 6-311G** | cc-pVTZ |
| $H_{ax1}-P-H_{ax2}$ | -0.013    | -0.013   | -0.011  |
| $F_{ax1}-P-F_{ax2}$ | 0.010     | -        | -       |
| $P-H_{ax1}$         | 0.654     | 0.643    | 0.636   |
| $P-F_{ax1}$         | 0.341     | 0.434    | 0.323   |
| $P-H_{eq1}$         | 0.804     | 0.793    | 0.779   |
| $P-H_{eq1}$         | 0.556     | 0.674    | 0.549   |

\* Values obtained for  $P-X_{eq}$  bonds are all equal to each other by symmetry. Likewise in case of  $P-X_{ax}$ .

E.S.I.24 Plot of Laplacian of charge density at the null isosurface for all compounds involved into  $PX_5$  dissociation reactions.

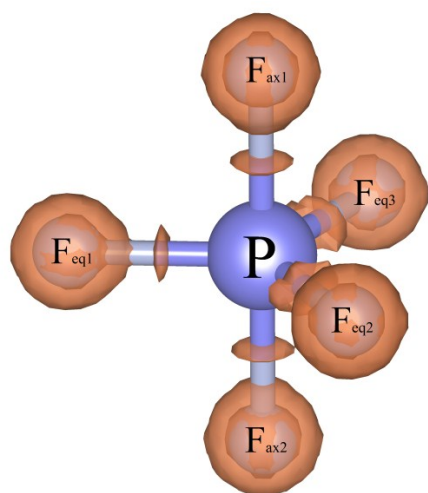

$PF_5$

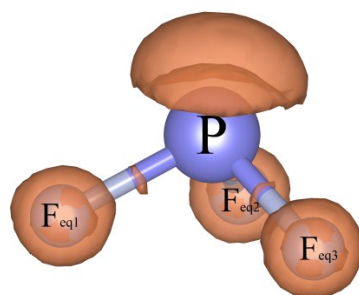

$PF_3$

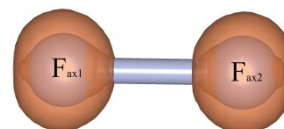

$F_2$

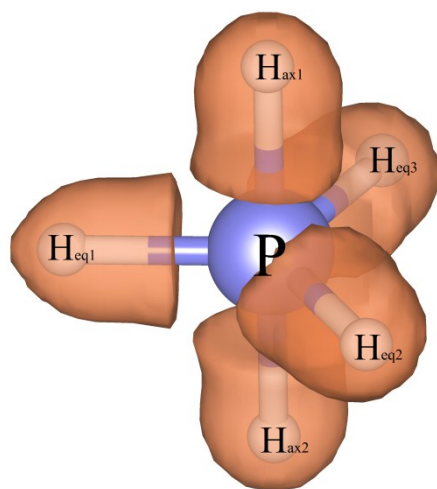

$PH_5$

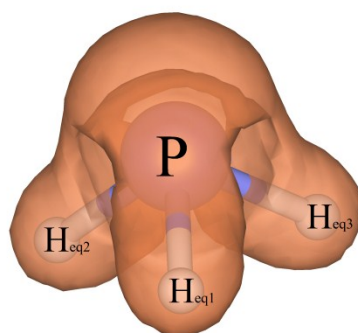

$PH_3$

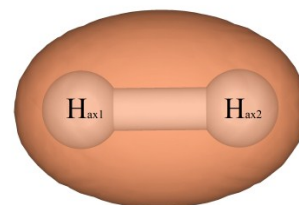

$H_2$
